# Supplementary material
Source: Research Square preprint supplement (doi:10.21203/rs.3.rs-10216670/v1)
Supplement: Supplementary file 1 [file 0ae70ca3d21305d87e1ae8a3.docx]

**Supplementary Information**

**Supplementary Information 1 Scripts for quantifications in QuPath**


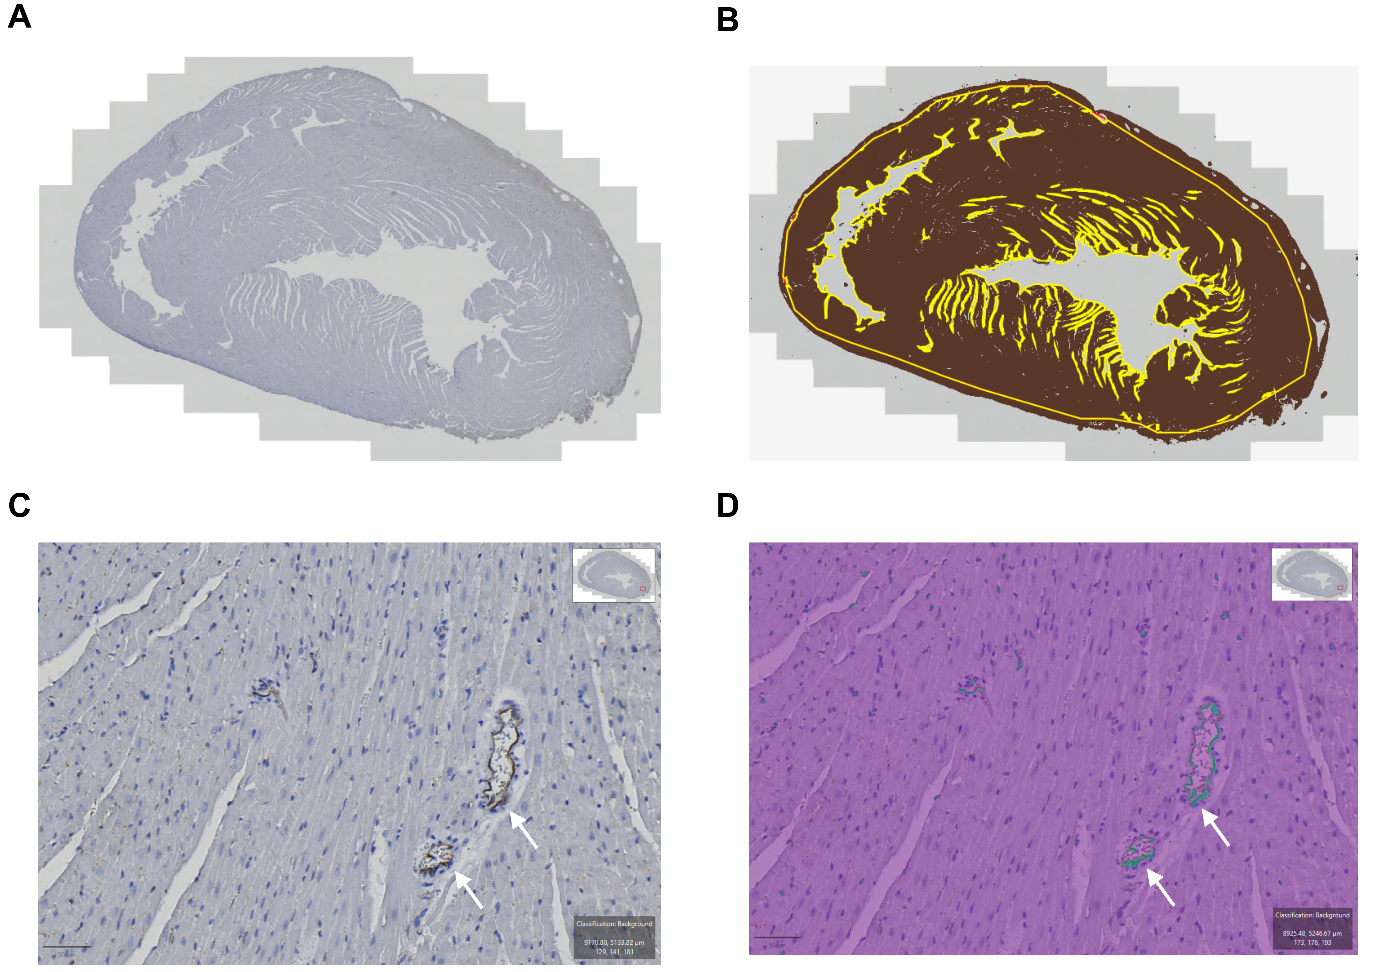


**s SI2** Images of histological staining and classifiers. A CD31 staining is chosen for illustration. (A) Whole cardiac tissue slide. (B) Threshold for detection of tissue. (C) Image of vessels positive for CD31 with arrows marking the staining and (D) image of pixel classification for quantification of CD31 expression.

//Threshold

setImageType('BRIGHTFIELD_H_DAB');

setColorDeconvolutionStains('{"Name" : "H-DAB default", "Stain 1" : "Hematoxylin", "Values 1" : "0.65111 0.70119 0.29049", "Stain 2" : "DAB", "Values 2" : "0.26917 0.56824 0.77759", "Background" : " 255 255 255"}');

selectAnnotations();

createAnnotationsFromPixelClassifier("Tissue_CD68", 1.0E7, 2000.0, "SPLIT")

//Pixel classification

setImageType('BRIGHTFIELD_H_DAB');

setColorDeconvolutionStains('{"Name" : "H-DAB default", "Stain 1" : "Hematoxylin", "Values 1" : "0.65111 0.70119 0.29049", "Stain 2" : "DAB", "Values 2" : "0.26917 0.56824 0.77759", "Background" : " 255 255 255"}');

selectAnnotations();

AddPixelClassifierMeasurements(“CD68_DOX_002_v2”, “CD68_DOX_002_v2)

**Supplementary Information 2 [64Cu]Cu-DOTATATE PET uptake values at baseline**

| **ROI** | **Group** | **Animals (n)** | **SUVmean (g/mL) ± SD** | ***p*-value** |
| --- | --- | --- | --- | --- |
| Inferior wall | Control | 2 | 0.208 ± 0.02 | 0.458 |
| 10.5 mg/kg | 9 | 0.177 ± 0.04 |
| 12.5 mg/kg | 3 | 0.210 ± 0.05 |
| Septum | Control | 2 | 0.232 ± 0.00 | 0.740 |
| 10.5 mg/kg | 9 | 0.276 ± 0.14 |
| 12.5 mg/kg | 3 | 0.221 ± 0.05 |
| Anterior wall | Control | 2 | 0.184 ± 0.0 | 0.806 |
| 10.5 mg/kg | 9 | 0.225 ± 0.12 |
| 12.5 mg/kg | 3 | 0.187 ± 0.04 |
| Lateral wall | Control | 2 | 0.222 ± 0.04 | 0.836 |
| 10.5 mg/kg | 9 | 0.245 ± 0.11 |
| 12.5 mg/kg | 3 | 0.207 ± 0.04 |

**Supplementary Information 3 [64Cu]Cu-DOTATATE PET uptake values**

|  | **SUVmax (g/mL) ± SD** | | | | | |
| --- | --- | --- | --- | --- | --- | --- |
| **ROI** | **Baseline** | **Group** | **Week 4** | ***p*-value**  **(baseline vs. week 4)** | **Week 7** | ***p*-value**  **(week 4 vs. week 7)** |
| Inferior wall | 0.2458 ± 0.04 | Control | 0.3007 ± 0.03 | 0.1979 | 0.2761 ± 0.04 | 0.9923 |
| 10.5 mg/kg | 0.4944 ± 0.16 | <0.0001 | 0.7734 ± 0.14 | <0.0001 |
| 12.5 mg/kg | 0.6915 ± 0.17 | <0.0001 | N/A | N/A |
| Septum | 0.2484 ± 0.06 | Control | 0.3091 ± 0.04 | 0.1136 | 0.2626 ± 0.04 | 0.7564 |
| 10.5 mg/kg | 0.5110 ± 0.16 | <0.0001 | 0.8015 ± 0.18 | <0.0001 |
| 12.5 mg/kg | 0.6897 ± 0.11 | <0.0001 | N/A | N/A |
| Anterior wall | 0.1993 ± 0.04 | Control | 0.2636 ± 0.05 | 0.0775 | 0.2291 ± 0.02 | 0.9405 |
| 10.5 mg/kg | 0.3962 ± 0.10 | 0.0001 | 0.5962 ± 0.09 | 0.0044 |
| 12.5 mg/kg | 0.4927 ± 0.09 | <0.0001 | N/A | N/A |
| Lateral wall | 0.2295 ± 0.05 | Control | 0.2760 ±0.03 | 0.3904 | 0.2768 ± 0.01 | >0.999 |
| 10.5 mg/kg | 0.4645 ± 0.16 | <0.0001 | 0.6990 ± 0.16 | 0.0005 |
| 12.5 mg/kg | 0.6012 ± 0.16 | <0.0001 | N/A | N/A |

**Supplementary Information 4 Heamatology**

|  | **Baseline** | **Week 2** | ***p*-value**  **(baseline vs. week 2)** | **Week 5** | ***p*-value**  **(week 2 vs. week 5)** | **Week 7** |
| --- | --- | --- | --- | --- | --- | --- |
| WBC (103/µL) | 10.34 ± 1.31 | 8.862 ± 2.46 | 0.5307 | 7.964 ± 2.88 | 0.7841 | 2.210 ± 0.55 |
| Neutrophils (103/µL) | 1.184 ± 0.27 | 2.168 ±1.18 | 0.5556 | 2.510 ± 1.20 | 0.9987 | 0.835 ± 0.40 |
| Lymphocytes (103/µL) | 8.512 ± 0.89 | 4.814 ± 1.09 | 0.0003 | 3.886 ± 1.09 | 0.4731 | 1.175 ± 0.02 |
| Monocytes (103/µL) | 0.596 ± 0.20 | 1.820 ± 1.17 | 0.3222 | 1.534 ± 0.91 | 0.9745 | 0.145 ± 0.12 |
| Eosinophils (103/µL) | 0.032 ± 0.02 | 0.018 ± 0.01 | 0.4364 | 0.022 ± 0.01 | 0.9697 | 0.050 ± 0.00 |
| Basophils (103/µL) | 0.012 ± 0.01 | 0.042 ± 0.05 | 0.3530 | 0.012 ± 0.02 | 0.3530 | 0.005 ± 0.01 |
| Neutrophils % | 11.36 ± 1.71 | 23.56 ± 6.80 | 0.0430 | 31.28 ± 7.88 | 0.2674 | 36.75 ± 8.98 |
| Lymphocytes % | 82.54 ± 2.41 | 57.24 ± 17.43 | 0.0153 | 49.80 ± 7.43 | 0.7215 | 54.45 ± 12.5 |
| Monocytes % | 5.660 ± 1.26 | 18.54 ± 11.21 | 0.0547 | 18.50 ± 5.61 | >0.999 | 5.850 ± 3.61 |
| Eosinophils % | 0.340 ± 0.17 | 0.240 ± 0.05 | 0.7611 | 0.260 ± 0.09 | 0.9972 | 2.500 ± 0.42 |
| Basophils % | 0.100 ± 0.07 | 0.420 ± 0.44 | 0.3002 | 0.160 ± 0.11 | 0.4687 | 0.450 ± 0.35 |
| RBC (106/µL) | 9.614 ± 0.53 | 8.300 ± 0.68 | 0.1466 | 5.462 ±1.23 | 0.0012 | 1.600 ± 1.02 |
| Hemoglobin (g/dL) | 17.20 ± 0.81 | 15.10 ± 1.30 | 0.0447 | 10.30 ± 1.45 | 0.0001 | N/A |
| Hematocrit % | 48.06 ± 2.25 | 41.22 ± 3.36 | 0.0882 | 25.86 ± 5.98 | 0.0003 | 8.400 ± 3.82 |
| MCV (fL) | 50.02 ± 0.68 | 49.62 ± 0.58 | 0.9971 | 47.40 ± 0.32 | 0.6977 | 56.05 ± 11.4 |
| MCH (pg) | 17.86 ± 0.31 | 18.16 ± 0.29 | >0.999 | 19.46 ± 3.89 | >0.999 | 298.4 ± 180 |
| MCHC (g/dL) | 35.76 ± 0.23 | 36.64 ± 0.27 | >0.999 | 41.06 ± 8.02 | 0.9994 | 510.1 ± 217 |
| RDW-CV % | 12.16 ± 0.15 | 13.28 ± 0.81 | 0.9750 | 13.80 ± 0.60 | 0.9973 | 26.00 ± 15.3 |
| Platelets (103/µL) | 488.0 ± 91.2 | 888.4 ± 269 | 0.0819 | 913.0 ± 319 | 0.9984 | 483.0 ± 89.1 |
| MPV (pL) | 7.360 ± 0.38 | 6.780 ± 0.38 | 0.0903 | 4.400 ± 0.57 | 0.9997 | 4.400 ± 0.57 |
