# Supplementary material
Source: Research Square preprint supplement (doi:10.21203/rs.3.rs-10216670/v1)

**Graphical abstract**


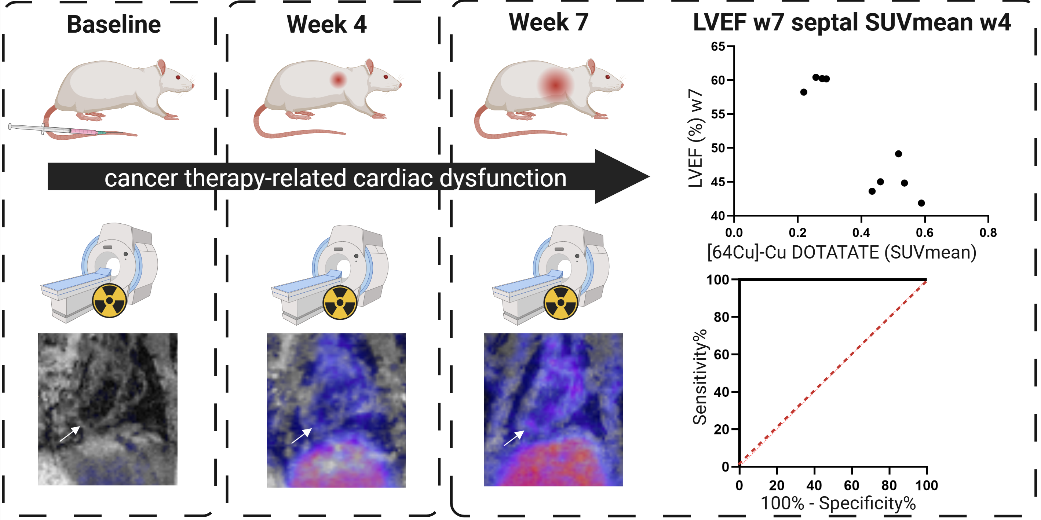

Supplement: Supplementary file 2 [file 59e2e33decd60beb2da8fc03.docx]
